# Supplementary figures and images for: Increased circulating endothelial microparticles in COPD patients: a potential biomarker for COPD exacerbation susceptibility
Source: HighWire-hosted journal article supplement (doi:10.1136/thoraxjnl-2011-201395), 2012-07-27

## PECAM

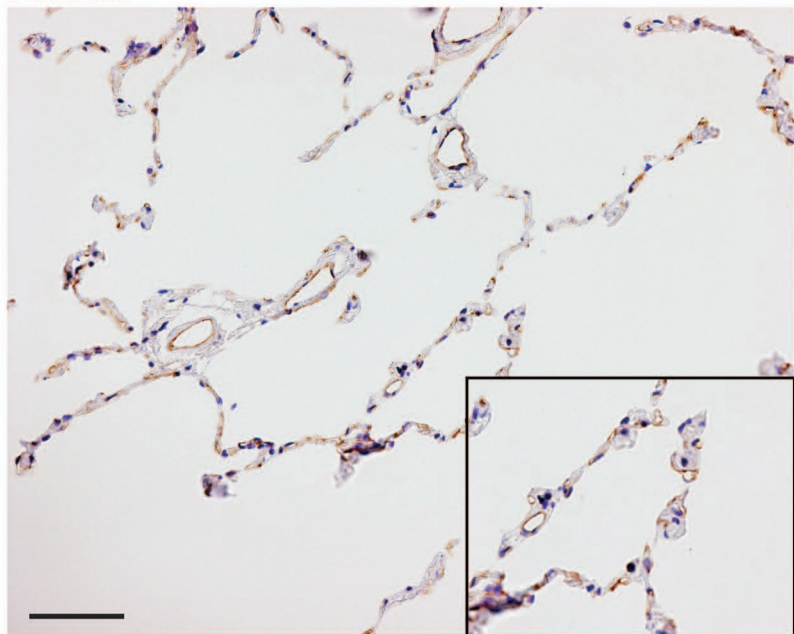

## von Willebrand factor

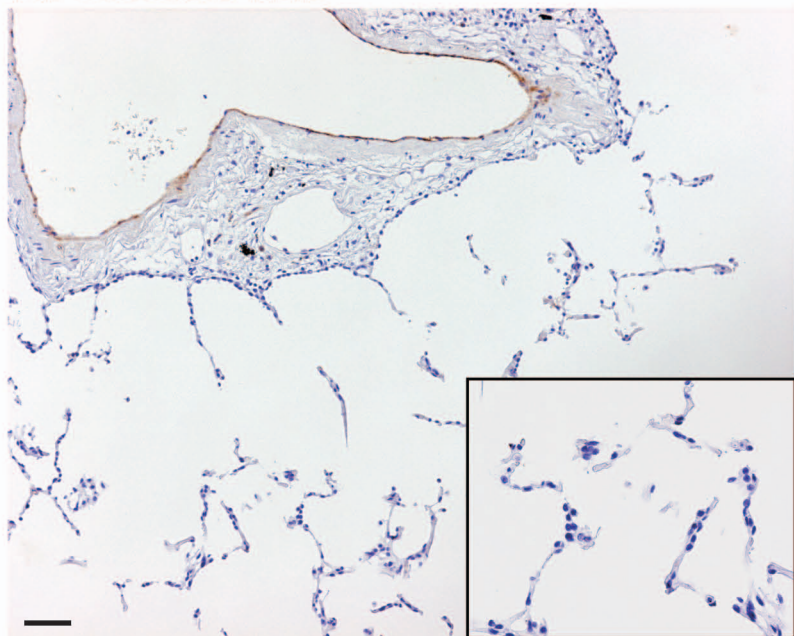

Supplement: thoraxjnl-2011-201395-s2.pdf [file thoraxjnl-2011-201395-s2.pdf]

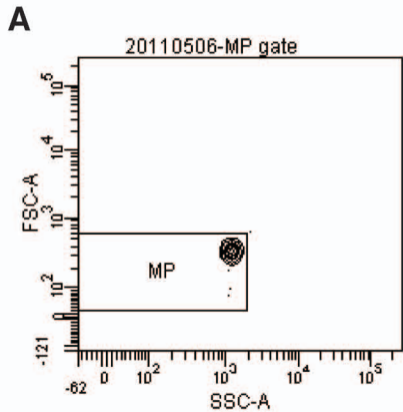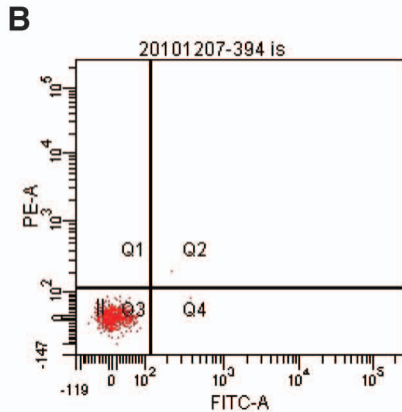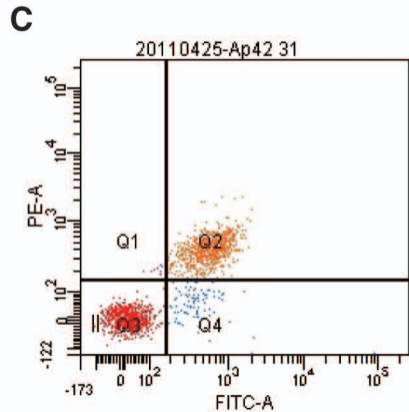

Supplement: thoraxjnl-2011-201395-s3.pdf [file thoraxjnl-2011-201395-s3.pdf]

**A**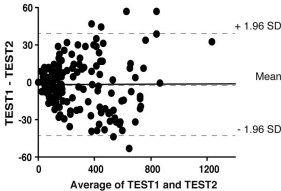**B**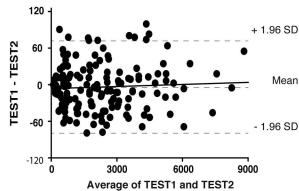**C**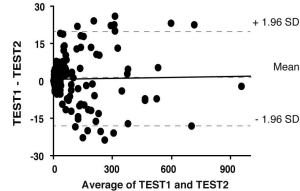**D**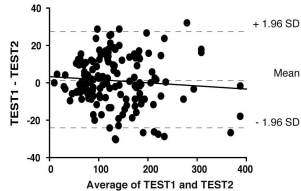

Supplement: thoraxjnl-2011-201395-s5.pdf [file thoraxjnl-2011-201395-s5.pdf]
